# Supplementary material for: Prediction of highly expressed genes in microbes based on chromatin accessibility
Source: PubMed Central journal article supplement (PMC1805505; doi:10.1186/1471-2199-8-11), 2007-02-13
Supplement: 1471-2199-8-11-S1.pdf [file 1471-2199-8-11-S1.pdf]

**Table S 1. Significance (P-values) of difference between tCAI or position preference values of genes with either 10% highest or 10% lowest expression values.**

|                          | tCAI    | position preference |
|--------------------------|---------|---------------------|
| <i>E. coli</i>           | ~0      | 1.5e-34             |
| <i>P. aeruginosa</i>     | ~0      | 8.4e-15             |
| <i>G. sulfurreducens</i> | 1.5e-14 | 3.2e-3              |
| <i>C. jejuni</i>         | ~0      | 3.1e-28             |
| <i>B. subtilis</i>       | ~0      | 2.5e-12             |
| <i>S. cerevisiae</i>     | ~0      | 5.8e-97             |

**Table S 2. Comparison of position preference values and microarray gene expression values.**

|                          | Spearman's correlation (rho) | overlap between 10% lowest PP and 10% most highly expressed, Fisher's exact test |
|--------------------------|------------------------------|----------------------------------------------------------------------------------|
| <i>S. cerevisiae</i>     | -0.36 (P-value = 2.7e-168)   | 5.9e-117                                                                         |
| <i>E. coli</i>           | -0.20 (P-value = 1.7e-39)    | 1.3e-37                                                                          |
| <i>P. aeruginosa</i>     | -0.20 (P-value = 9.2e-51)    | 3.3e-25                                                                          |
| <i>G. sulfurreducens</i> | -0.11 (P-value = 5.7e-11)    | 0.0083                                                                           |
| <i>C. jejuni</i>         | -0.44 (P-value = 6.2e-77)    | 5.1e-27                                                                          |
| <i>B. subtilis</i>       | -0.11 (P-value = 7.3e-11)    | 7.2e-05                                                                          |
